## RESEARCH ARTICLE

# Salinity- and population-dependent genome regulatory response during osmotic acclimation in the killifish (*Fundulus heteroclitus*) gill

Andrew Whitehead<sup>1,\*</sup>, Jennifer L. Roach<sup>2</sup>, Shujun Zhang<sup>2</sup> and Fernando Galvez<sup>2</sup>

<sup>1</sup>University of California, Davis, Environmental Toxicology Department, Davis, CA 95616, USA and

<sup>2</sup>Louisiana State University, Department of Biological Sciences, Baton Rouge, LA 70803, USA

\*Author for correspondence (awhitehead@ucdavis.edu)

Accepted 19 December 2011

### SUMMARY

The killifish *Fundulus heteroclitus* is abundant in osmotically dynamic estuaries and it can quickly adjust to extremes in environmental salinity. We performed a comparative osmotic challenge experiment to track the transcriptomic and physiological responses to two salinities throughout a time course of acclimation, and to explore the genome regulatory mechanisms that enable extreme osmotic acclimation. One southern and one northern coastal population, known to differ in their tolerance to hypo-osmotic exposure, were used as our comparative model. Both populations could maintain osmotic homeostasis when transferred from 32 to 0.4 p.p.t., but diverged in their compensatory abilities when challenged down to 0.1 p.p.t., in parallel with divergent transformation of gill morphology. Genes involved in cell volume regulation, nucleosome maintenance, ion transport, energetics, mitochondrion function, transcriptional regulation and apoptosis showed population- and salinity-dependent patterns of expression during acclimation. Network analysis confirmed the role of cytokine and kinase signaling pathways in coordinating the genome regulatory response to osmotic challenge, and also posited the importance of signaling coordinated through the transcription factor HNF-4 $\alpha$ . These genome responses support hypotheses of which regulatory mechanisms are particularly relevant for enabling extreme physiological flexibility.

Supplementary material available online at <http://jeb.biologists.org/cgi/content/full/215/8/1293/DC1>

Key words: microarray, ecophysiology, comparative physiology, comparative genomics, physiological genomics, ecological genomics, *Fundulus heteroclitus*.

### INTRODUCTION

Estuaries are dynamic environments, where physical parameters such as temperature, hypoxia and salinity can change rapidly, stochastically and periodically, and can vary across small spatial scales. Successful estuarine residents must adjust their physiology to compensate for this environmental variation. The killifish *Fundulus heteroclitus* is able to adjust its physiology to compensate for extremes in all of these physical parameters (Burnett et al., 2007), but is perhaps most notable for its ability to acclimate to salinities from nearly four times that of seawater down to freshwater (Griffith, 1974). Within Atlantic coast estuarine habitats, *F. heteroclitus* is the numerically dominant vertebrate (Yozzo and Smith, 1997; Sweeney et al., 1998), and their extreme osmotic plasticity enables them to exploit osmotic niches that span the continuum from marine to freshwater. We apply a comparative approach, together with a physiological genomics experimental design, to explore the functional genomic mechanisms that enable this extreme physiological flexibility and account for subtle differences in hypo-osmotic tolerance.

Though much is known about the molecular effectors of osmotic acclimation, comparatively little is known of the signaling and regulatory networks in fish gills that integrate and transduce environmental cues to initiate the physiological acclimation response (Fiol and Kültz, 2007). Though transcription-independent signal transduction is an important component enabling the osmotic compensatory response (Kültz and Avila, 2001), transcriptomics tools offer a holistic top-down discovery-based approach for

exploring systems-level mechanisms involved in this complex physiological response.

Our experimental design includes comparison of two populations that vary in hypo-osmotic tolerance and exposure to two levels of hypo-osmotic stress, and follows physiological and transcriptomic responses throughout an acclimation time course. Though individuals are physiologically flexible, *F. heteroclitus* populations vary in their ability to acclimate to extreme osmotic challenges. For example, freshwater populations compensate for hypo-osmotic challenge more efficiently than brackish or coastal populations despite long-term rearing in seawater (Whitehead et al., 2011a), and northern coastal populations are more tolerant of hypo-osmotic challenge than southern coastal populations (Scott et al., 2004), indicating evolved intraspecific divergence in osmotic plasticity. We compared a northern coastal and a southern coastal population in a ‘common-garden’ experimental design to distinguish physiological and genomic responses to osmotic challenge that are under strong evolutionary constraint from those that are more prone to evolutionary divergence. We challenged populations with two levels of hypo-osmotic stress. At the less extreme stress level, populations did not differ in physiological response, whereas at the more extreme stress level, population differences emerged. We were particularly interested in genes that differed in their transcriptional response between the two stress levels, as traits that show a ‘dose-response’ may be more functionally relevant to osmotic challenge than traits that show a more general response. Finally, we sampled

fish at multiple time points during an acclimation period to capture the temporal dynamics of this multi-phased physiological adjustment. Measurement of plasma ions and electron microscopy of gill morphology was used to characterize the nature and time course of common as well as population- and salinity-dependent adjustments at the organ and organ-system levels. Transcriptomics was used to characterize the dynamics of genome response to osmotic challenge, and to generate hypotheses about the important genes, pathways and higher-order networks that enable the extreme physiological flexibility that we observed.

## MATERIALS AND METHODS

### Osmotic challenge experiments

Adult *Fundulus heteroclitus* (Linnaeus 1766) were collected from coastal New Hampshire (NH population) and coastal Georgia (GA population) and acclimated to full-strength seawater (32 p.p.t.) in a common re-circulating system for at least 6 months prior to experiments. Re-circulating systems were equipped with mechanical, biological and ultraviolet filtration. For osmotic challenge experiments, fish were manually transferred to 32 p.p.t. (control), 0.4 p.p.t. or 0.1 p.p.t. re-circulating systems and maintained at a density of one fish (4 g average) per gallon. Water chemistry for the 0.1 p.p.t. treatment was as follows:  $[Na^+] = 293 \pm 8.7 \mu\text{mol l}^{-1}$ ,  $[Cl^-] = 1250 \pm 32.8 \mu\text{mol l}^{-1}$ ,  $[Ca^{2+}] = 337 \pm 11.7 \mu\text{mol l}^{-1}$ ,  $[Mg^{2+}] = 117 \pm 3.8 \mu\text{mol l}^{-1}$  and  $[K^+] = 58 \pm 2.6 \mu\text{mol l}^{-1}$  ( $N=8$ ). The 0.4 and 32 p.p.t. treatments were approximately 1.1 and 91.4% of full-strength seawater, respectively. The concentrations of nitrogenous waste products, which were measured approximately once every 2 days ( $N=8$ ), were always non-detectable. The photoperiod was 12 h:12 h light:dark, and temperature was kept at ambient (approximately 21°C).

Tissues were sampled pre-transfer (32 p.p.t.; 0 h), and at 6 h, 24 h, 72 h (3 days), 168 h (7 days) and 336 h (14 days) post-transfer to hypo-osmotic treatments for gene expression and physiology measures. Tissues were also collected from the 32 p.p.t. transfer time course for physiology measures. We chose these salinities because several studies have suggested that the gills of *F. heteroclitus* transition between a seawater and freshwater morphology at approximately 0.4 p.p.t. (Copeland, 1950; Philpott and Copeland, 1963). Exposure to 0.4 p.p.t. is the most extreme challenge where both populations were capable of maintaining homeostasis, whereas challenge down to 0.1 p.p.t. revealed compromised homeostatic maintenance and population variation in the pace of recovery of osmotic balance. Exposure to less severe hypo-osmotic challenge may reveal different homeostatic mechanisms, and may be the focus of future studies. At each sampling time point, plasma was collected by caudal puncture and was immediately isolated for ion measurements, one gill basket was excised and preserved for electron microscopy, and the other gill basket was preserved in RNAlater (Ambion, Austin, TX, USA) for transcriptomics. This experimental procedure is directly comparable to that of previous studies (Whitehead et al., 2011a; Whitehead et al., 2011b). All fish were treated in accordance with approved institutional animal care and use protocols.

### Physiology

Fish were killed by cephalic dislocation and sampled immediately for blood by cardiac puncture using ammonium-heparinized hematocrit capillary tubes. Blood was spun at approximately 2000 g for 2 min, and plasma was collected and frozen in liquid nitrogen prior to processing. Plasma was analyzed for osmolality using a freeze-point osmometer (Micro-osmometer 5004, Precision Systems, Natick, MA, USA), sodium by flame atomic absorption

spectrophotometry (Varian AA240FS, Agilent Technologies, Santa Clara, CA, USA), and chloride using a modification of the mercuric-thiocyanate method (Zall et al., 1956). All plasma chemistry data are expressed as means  $\pm$  s.e.m. For plasma chemistry, we used a one-way ANOVA with a Student–Newman–Keuls test, with an alpha level of 0.05 (SPSS version 17, IBM, Armonk, NY, USA). Fish gills were washed briefly in deionized water and then each gill arch was isolated. The first two left gill arches were immersed in fixative buffer (2% glutaraldehyde, 1% formaldehyde in 0.1 mol l<sup>-1</sup> cacodylate) for 4 h, rinsed in 0.1 mol l<sup>-1</sup> cacodylate buffer containing 0.02 mol l<sup>-1</sup> glycine, post-fixed in 2% osmium tetroxide for 1 h, and rinsed in water. Samples were dehydrated with an ethanol series, dehydrated with liquid CO<sub>2</sub> in a Denton critical point dryer (Cherry Hill, NJ, USA), mounted on aluminum scanning electron microscope (SEM) stubs, and coated with a gold:palladium solution (60:40 v:v) in an Edwards S150 sputter coater (Ashbord, Kent, UK). Random images of the afferent edge of gill filaments were captured using a JSM-6610 high vacuum mode SEM (Tokyo, Japan).

### Gene expression profiling

Total RNA was isolated from gill tissues following homogenization in Trizol reagent (Invitrogen, Carlsbad, CA, USA) and purified using spin columns. Antisense RNA (aRNA) was prepared using the MessageAmp II aRNA amplification kit (Ambion, Austin, TX, USA), and high-quality total RNA and aRNA was verified using microfluidic electrophoresis (Experion instrument and reagents, Bio-Rad Laboratories, Hercules, CA, USA). Purified aRNA was then coupled with Alexa Fluor dyes (Alexa Fluor 555 and 647, Molecular Probes, Eugene, OR, USA), coupled aRNA was cleaned up using spin columns, and pairs of samples were competitively hybridized to custom oligonucleotide microarrays (Agilent Technologies, Santa Clara, CA, USA) following the manufacturer's protocols. Five biological replicates were hybridized per treatment, and each replicate sample was hybridized twice (including a dye swap) in a loop design where the treatment source of paired samples was balanced across treatments. Samples were enclosed in a SureHyb microarray hybridization chamber (Agilent Technologies) and incubated at 60°C for 18 h, following which slides were washed according to the manufacturer's protocols and scanned using a Packard BioScience Scanarray Express (PerkinElmer, Waltham, MA, USA), and images were processed using ImaGene (BioDiscovery, Inc., El Segundo, CA, USA). The microarray platform was the same as that used in Whitehead et al. (Whitehead et al., 2011a; Whitehead et al., 2011b). Probes ( $N=6800$ ) were designed from *F. heteroclitus* expressed sequence tag (EST) sequences and included all ESTs that could be annotated. The 6800 probes (representing 6800 UniGene target sequences) were printed in duplicate, including control spots, within the Agilent 15K-element 8-plex platform (Agilent eArray design ID 021434). Spots that were too bright (signal saturated) or too faint (signal less than two standard deviations above background intensity) were excluded from normalization and analysis.

Raw data were LOWESS-normalized, followed by mixed model normalization where 'dye' was treated as a fixed effect and 'array' was treated as a random effect, and normalized data were log<sub>2</sub>-transformed prior to statistical analysis. Normalized data were analyzed using mixed model ANOVA in JMP Genomics (SAS Institute, Cary, NC, USA), where main effects included 'population' (NH or GA), 'salinity' (0.4 or 0.1 p.p.t. transfer) and 'time' (0, 6, 24, 72 and 168 h). An effect of salinity was detected by comparing expression post-transfer with that pre-transfer, rather than with time-matched no-transfer controls. The model was fully specified, including all three two-way interaction terms and the single three-

way interaction term. ‘Dye’ was treated as a fixed effect, and ‘array’ and the five replicate individuals within each treatment were treated as random effects. Main effects and interactions were considered statistically significant at  $P < 0.01$ , and false discovery rates were estimated using the  $q$ -value (Storey and Tibshirani, 2003) in R (R Foundation for Statistical Computing, Vienna, Austria). Network analysis was performed using Ingenuity Pathway Analysis (Ingenuity Systems Inc., Redwood City, CA, USA), and gene ontology enrichment analysis was performed using the Functional Annotation Clustering tool within the DAVID Bioinformatics Database (Huang et al., 2009).

## RESULTS AND DISCUSSION

### Physiological acclimation

Upon hypo-osmotic shock, blood plasma is expected to become diluted if fish are not capable of regulating net flux by either reducing diffusive ion loss or stimulating active ion uptake. Remarkably, *F. heteroclitus* did not lose osmotic balance when transferred from seawater (32 p.p.t.) to 0.4 p.p.t. (Fig. 1) at any time point post-transfer, suggesting an excellent propensity for ionoregulatory compensation. Only when severely challenged by exposure to 0.1 p.p.t. did fish temporarily lose osmotic homeostasis, and differences between populations emerged. Plasma osmolality and  $\text{Na}^+$  concentrations dropped immediately (Fig. 1A,B). Recovery to levels of 32 p.p.t.

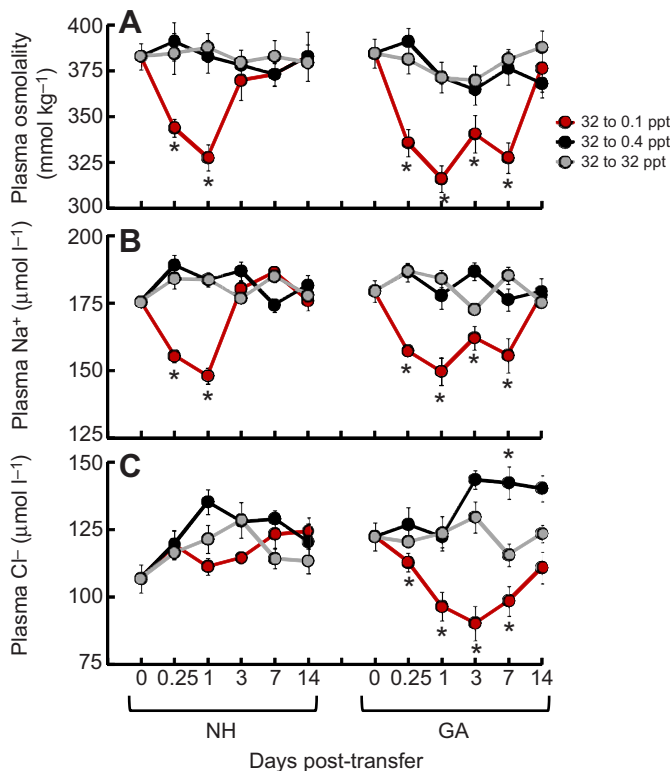

Fig. 1. Plasma osmolality and ion concentrations during acclimation to hypo-osmotic challenge. Mean plasma osmolality (A), plasma sodium (B), and plasma chloride (C) concentrations are illustrated for each of two populations [New Hampshire (NH) and Georgia (GA)] of *Fundulus heteroclitus* at each of six sampling times: 0 h (pre-transfer, 32 p.p.t.), 6 h (0.25 days), 1 day, 3 days, 7 days and 14 days post-transfer to 32 p.p.t. control (gray data points and lines), 0.4 p.p.t. (black data points and lines) and 0.1 p.p.t. (red data points and lines). Data points represent means from six replicate fish, and bars represent  $\pm$ s.e.m. Asterisks indicate treatment means that are significantly different ( $P < 0.05$ ) from the 32 p.p.t. controls.

controls was within 3 days in the NH population but required up to 2 weeks in the GA population. The NH population was especially proficient in maintaining plasma  $\text{Cl}^-$  concentrations, as concentrations did not differ from controls at any time post-transfer even at 0.1 p.p.t. (Fig. 1C), whereas the GA population lost  $\text{Cl}^-$  balance immediately at 0.1 p.p.t., and again required up to 2 weeks for plasma  $\text{Cl}^-$  to return to control concentrations (Fig. 1C). This population variation is consistent with that found in a previous study, indicating that northern populations of *F. heteroclitus* tolerate hypo-osmotic shock better than southern populations (Scott et al., 2004), and that enhanced freshwater tolerance is associated with improved plasma  $\text{Cl}^-$  regulation. Furthermore, the northern clade of *F. heteroclitus* shares a similar genetic background with freshwater populations (Smith et al., 1998; Duvernell et al., 2008; Whitehead, 2009), and these freshwater populations are also more tolerant of hypo-osmotic shock, and refractory to impairment of plasma  $\text{Cl}^-$  concentrations, than populations with a southern genetic background (Whitehead et al., 2011a).

Although the mechanistic basis of regulation of  $\text{Cl}^-$  loss is not well understood, tight junction proteins, which regulate the conductance and the relative ionic permeability of the paracellular pathway, are likely influential in conferring a low paracellular loss of  $\text{Cl}^-$  in the face of osmotic stress (Wood and Grosell, 2008; Wood and Grosell, 2009). In addition to reducing ion efflux following hypo-osmotic exposure, restoration of ion homeostasis necessitates activation of active ion transport at the gill, a process most typically performed by mitochondrion-rich cells in the gill epithelium. Remodeling of the gill epithelium is a well-known core component of the osmotic acclimation response in euryhaline fishes. The gills in the NH population made a quick and full transition from a seawater to a freshwater phenotype only 1 day after hypo-osmotic exposure, whereas the GA population maintained a mixed seawater and freshwater gill mitochondrion-rich cell phenotype even after 14 days (Fig. 2). These results are consistent with those of Scott et al. (Scott et al., 2004) and Whitehead et al. (Whitehead et al., 2011a), who also demonstrated subtle population differences in the expression of gill cells on the epithelial surface. In our study, many genes associated with cell cycle regulation, cell growth and cell morphology were upregulated early and transiently, suggesting a putative role in epithelial plasticity during osmotic acclimation.

### Transcriptome response during acclimation

Acclimation to hypo-osmotic environments was associated with a substantial and complex genome expression response in gills of *F. heteroclitus*. One-third of transcripts included in the analysis (1177 transcripts) showed differential expression with time ( $P < 0.01$ ,  $q < 0.009$ ). A more nuanced analysis of hypo-osmotic transcriptional response explored acclimation-associated transcription that was dependent on population (NH vs GA) or salinity (0.1 vs 0.4 p.p.t.). A core set of 979 genes showed an acclimation time-course expression response that was common across both populations and both salinities (no significant interactions; Fig. 3A). A population-dependent acclimation time course response was detected for 131 transcripts (interaction between main effects ‘time’ and ‘population’,  $P < 0.01$ ,  $q < 0.175$ ; Fig. 3B). A salinity-dependent acclimation time course response was detected for 218 transcripts (interaction between main effects ‘time’ and ‘salinity’,  $P < 0.01$ ,  $q < 0.143$ ; Fig. 3C). The general pattern of temporal expression that we observed for genes showing a salinity-dependent time course response was a transient change in expression level at 0.4 p.p.t., but a sustained change in expression at 0.1 p.p.t. (Fig. 3C).

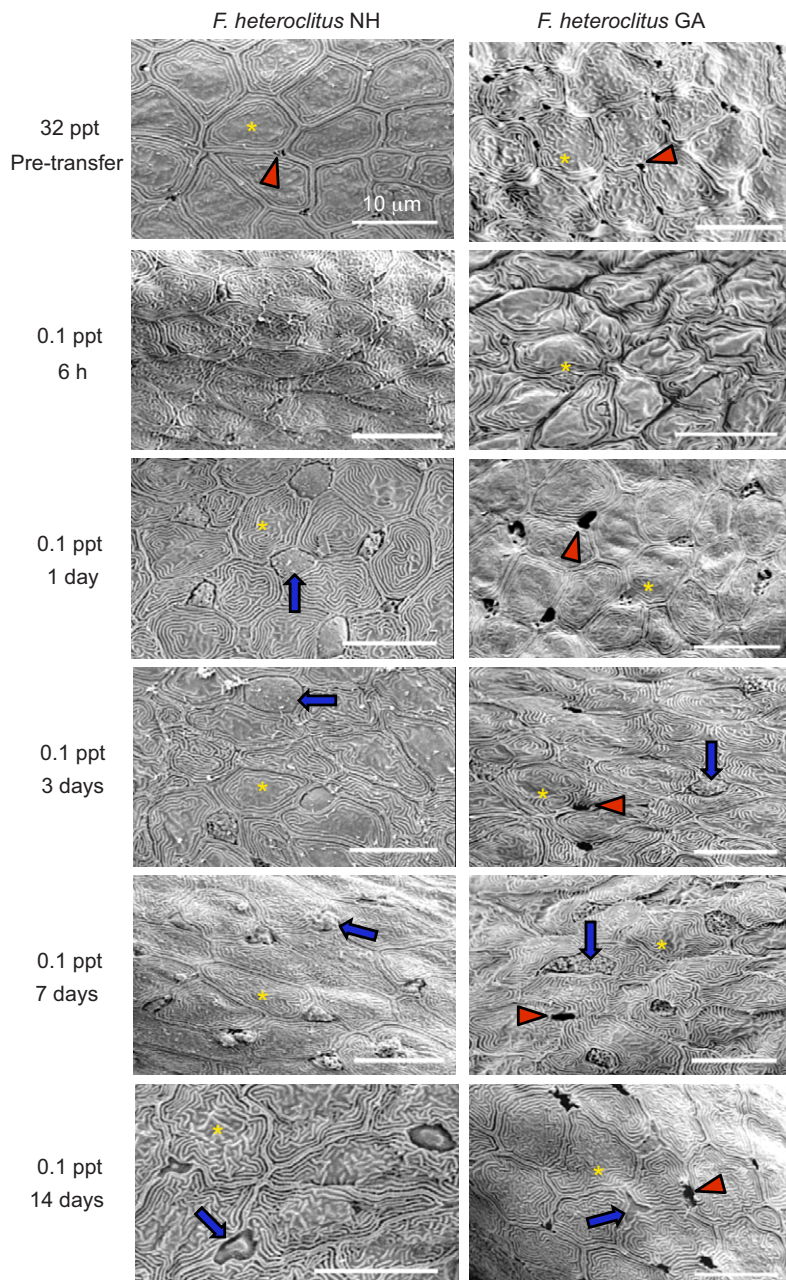

Fig. 2. Scanning electron micrograph images of the gill surface of *F. heteroclitus* from coastal New Hampshire (NH) or coastal Georgia (GA) exposed to 32 p.p.t. (pre-transfer controls), or at 6 h, 1 day, 3 days, 7 days or 14 days post-transfer to 0.1 p.p.t. Asterisks indicate pavement cells, red arrowheads point to seawater-type mitochondrion-rich cells (MRCs), and blue arrows point to freshwater-type MRCs. Gills from fish of both populations acclimated to 32 p.p.t. have only seawater-type MRCs. Gills from killifish from the GA population exposed to 0.1 p.p.t. show swelling after 6 h exposures, but eventually have a gill surface expressing a mixed population of freshwater- and seawater-type MRCs. In contrast, the gills of NH killifish exposed to 0.1 p.p.t. show fewer signs of damage and predominantly express a freshwater-type MRC population. Scale bars, 10  $\mu$ m.

### Water and cell volume regulation

Aquaporin proteins are integral membrane proteins that facilitate the movement of water and other small solutes across biological membranes (Cerdeira and Finn, 2010). We found that aquaporin 3 (AQP3) was quickly upregulated upon hypo-osmotic challenge (Fig. 4A), with mRNA more strongly upregulated in the NH population than in the GA population immediately (6 h) following transfer, and upregulation tending to be more sustained at 0.1 p.p.t. but transient at 0.4 p.p.t. ( $P < 0.01$ ). NH fish retained osmotic homeostasis at 0.4 p.p.t. and AQP3 was only transiently upregulated, whereas GA fish at 0.1 p.p.t. took the longest to recover osmotic homeostasis and upregulation of AQP3 was sustained. Previous studies have shown transcriptional upregulation of AQP3 paralogs in the gills of freshwater-acclimated teleosts, though differences in cellular localization in branchial epithelia are evident among species. Some studies have described both basal and apical localization, suggesting a putative role in transepithelial water flux to minimize

swelling or dehydration (Cutler and Cramb, 2002; Lignot et al., 2002). AQP3 expression may also facilitate other physiological functions, including ammonia or urea permeability, osmoreception or regulatory volume decrease. Challenge with hypo-osmotic conditions poses the immediate crisis of cell swelling, requiring the regulation of cell volume. Recently, AQP3 has been shown to facilitate preferential cellular uptake of water under hypotonic conditions, which facilitates an early increase in cell volume and a concomitant compensatory response aimed at restoring extracellular osmolality (Watanabe et al., 2005; Watanabe et al., 2009). Alternatively, AQP3 may be critical for the regulatory volume decrease (RVD) required after hypotonically induced cellular swelling, rather than in stimulating the initial cellular swelling as described in mammalian sperm (Chen et al., 2011). In general, RVD is achieved by activating transport systems that mediate the efflux of osmolytes out of the cell so that water will passively follow (Hochachka and Somero, 2002). Interestingly, we found that inositol monophosphatase (IMPA1) and versican (VCAN) were both

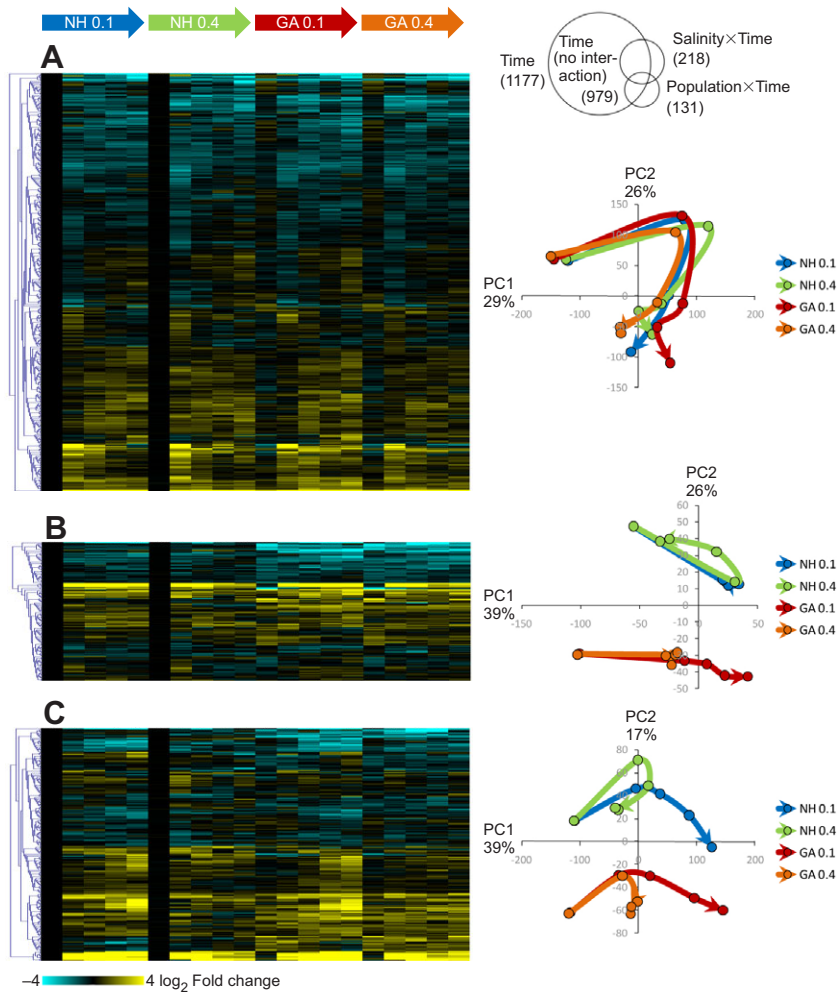

Fig. 3. Transcriptome response to hypo-osmotic challenge. Heat maps (left) represent mean fold increase (yellow cell color) or decrease (blue cell color) in expression relative to pre-transfer control. Rows represent individual genes, and columns represent treatment mean expression level. Each block of five columns represents the expression level for consecutive time points during acclimation (0 h, 6 h, 1 day, 3 days and 7 days) for the NH population transferred to 0.1 p.p.t. (block of columns represented by blue arrow), the NH population transferred to 0.4 p.p.t. (block of columns represented by green arrow), the GA population transferred to 0.1 p.p.t. (block of columns represented by red arrow) and the GA population transferred to 0.4 p.p.t. (block of columns represented by orange arrow). Genes are assigned to one of three groups depending on results from statistical tests. (A) Genes significant for the main effect 'time' but without any interaction with salinity or population (see Venn diagram) (979 genes). (B) Genes with population-dependent changes in expression during the acclimation time course (131 genes). (C) Genes with salinity-dependent changes in expression during the acclimation time course (218 genes). For each of these sets of genes, the heat map is shown on the left, and the trajectories of transcriptome change through consecutive time points during acclimation are represented in principal components (PC) analysis projections on the right. The proportion of variation accounted for by each PC is included in the axis labels of PC plots.

downregulated in response to hypo-osmotic conditions (Fig. 4B). IMPA1 regulates synthesis of the intracellular osmolyte myo-inositol (Michell, 2008) and VCAN attracts cations to retain cellular water and mediate regulatory volume increase (Faggian et al., 2007). This downregulation showed a population-dependent trend, although it was not statistically significant ( $P=0.08$  for IMPA1,  $P=0.11$  for VCAN). Reduction of intracellular osmolytes, together with the expression of basolateral AQP3, may contribute to RVD following the initial cellular swelling that is likely associated with significant reduction in plasma osmolytes.

Genes involved in the synthesis of polyamines (putrescine, spermine and spermidine) were also regulated in response to hypo-osmotic challenge. Ornithine decarboxylase 1 (ODC1) is the rate-limiting enzyme in polyamine synthesis, and showed a pattern of population- and salinity-dependent time-course expression highly correlated with AQP3 expression (Fig. 4C). ODC1 also shows species-specific regulation among native and invasive mussels upon hypo-osmotic challenge (Lockwood and Somero, 2011). Expression of arginase 2 (ARG2), the enzyme that synthesizes ornithine, showed a similar pattern of salinity-dependent expression and peak expression was delayed relative to ODC1 (Fig. 4C). Regulation of two additional genes was consistent with a role of increased polyamines in the hypo-osmotic compensatory response. Expression of a spermine-binding protein (SBP) quickly dropped to nearly non-detectable levels, and transglutaminase 1 (TGM1), which facilitates polyamine-to-protein conjugation, quickly increased in expression (Fig. 4D). Expression of these genes is consistent with increased

cellular free polyamine levels. Polyamines serve many cellular functions in a wide range of organisms (Rhee et al., 2007). One of these functions is to stabilize protein-protein and protein-nucleic acid interactions against changes in intracellular osmolyte levels (Capp et al., 1996). As proposed previously (Whitehead et al., 2011a), increased cellular polyamines may be important for stabilizing genome function in the face of rapid changes in osmolyte concentrations during osmotic challenge in fish, and may serve a similar role in bivalves (Lockwood and Somero, 2011).

#### Nucleosome regulation

Previous studies have indicated that regulation of histone gene expression is associated with osmotic acclimation in killifish (Whitehead et al., 2011b; Whitehead et al., 2011a), and we detected several histone transcripts with transient upregulation in response to hypo-osmotic challenge (Fig. 4E,F), two of which show salinity-dependent upregulation (Fig. 4E). Hypo-osmotic conditions can cause swelling of the nucleus and alter the structure and arrangement of chromatin, thereby potentially disrupting genome function (Finan and Guilak, 2010). Histone proteins contribute to maintaining the three-dimensional structure of chromatin, and their transient upregulation during the early crisis of cell swelling may be associated with conformational maintenance of chromatin.

#### Ion transport

The group of genes showing a salinity-dependent time-course response (Fig. 3C) was enriched with genes associated with the gene

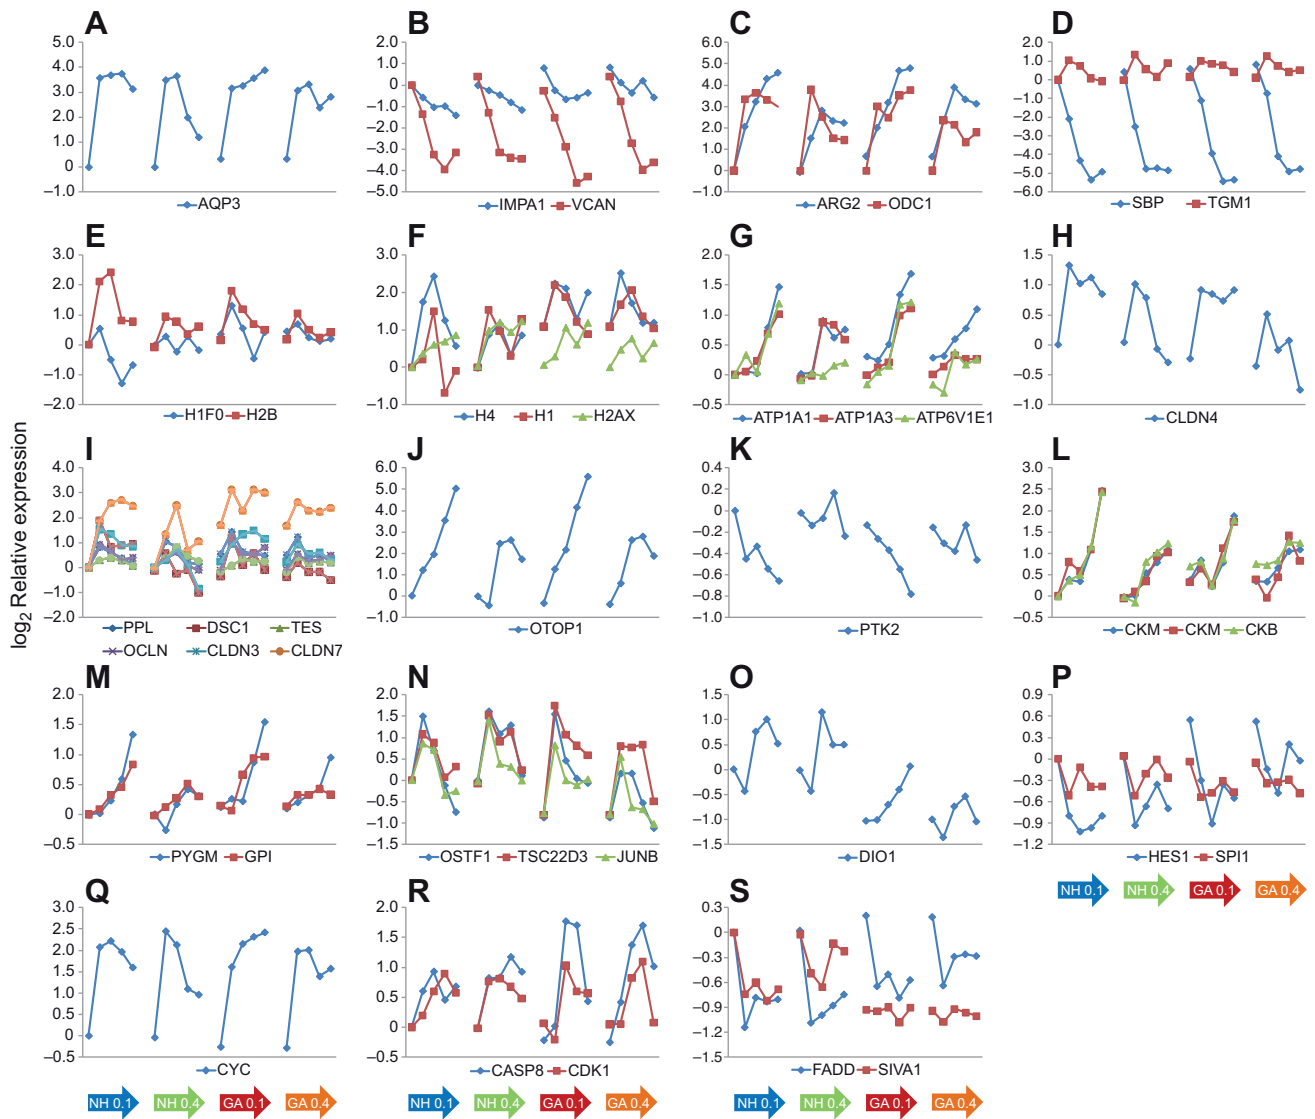

Fig. 4. Transcription change through the acclimation time course for individual genes highlighted in the text. (A,B) Cell volume and water; (C,D) polyamine; (E,F) nucleosome; (G–K) ion transport; (L,M) energetics; (N–P) transcription; and (Q–S) apoptosis. For each panel, the four series when moving from left to right represent the NH population transferred to 0.1 p.p.t., the NH population transferred to 0.4 p.p.t., the GA population transferred to 0.1 p.p.t., and the GA population transferred to 0.4 p.p.t. (see legend at the bottom, where the color of each arrow is consistent with colors that identify the same four series in other figures). Within each series, each data point represents the average expression level at consecutive sampling points including 0 h (pre-transfer), 6 h, 24 h, 3 days and 7 days post-transfer. The y-axis is the  $\log_2$  difference in expression level, so each unit represents a twofold change in expression. Gene abbreviations are defined in the text.

ontology term ‘transmembrane transport’ ( $P=0.02$ ) and included ion-transporting genes. Two subunits of the sodium/potassium-transporting ATPase (ATP1A1 and ATP1A3) showed salinity-dependent upregulation at 1 day post-transfer or later, where they were more highly upregulated in both populations at 0.1 p.p.t. than at 0.4 p.p.t. (Fig. 4G). These results are consistent with an increased requirement for, and stimulation of, active ion uptake in the gill upon hypo-osmotic transfer. In addition, the V-type proton ATPase (ATP6V1E1) was moderately upregulated (Fig. 4G). This protein has been putatively localized to the basolateral epithelium of gill cells, where it may aid in transepithelial  $\text{Na}^+$  uptake in freshwater or perhaps other diverse functions associated with freshwater acclimation, including acid–base regulation (Patrick et al., 1997; Patrick and Wood, 1999; Scott et al., 2005).

In contrast to the sodium/potassium and proton ATPases, which are upregulated later in the time course, claudin 4 (CLDN4) was rapidly upregulated (Fig. 4H). CLDN4 followed a salinity-dependent

response ( $P=1.0E-4$ ) where upregulation was sustained at 0.1 p.p.t. but was transient at 0.4 p.p.t. *Fundulus heteroclitus* is unusual among euryhaline fish insofar as they do not actively accumulate chloride from freshwater. Rather, they rely on limiting chloride efflux to compensate for hypo-osmotic environments (Patrick et al., 1997; Patrick and Wood, 1999; Scott et al., 2004), or acquiring the ion from dietary sources. Claudins are an expansive family of cellular tight junction proteins integral to the regulation of paracellular permeability and ion selectivity (Van Itallie and Anderson, 2006). Recent studies have described the differential expression of several claudin genes in the ion-transporting epithelia of teleost fish subjected to osmotic challenges (Bagherie-Lachidan et al., 2008; Bui et al., 2010; Clelland et al., 2010). Although poorly described, claudins may function to limit chloride efflux through the paracellular tight junctions of *Fundulus* gills during hypo-osmotic transfer, providing a potential mechanism for altering the relative ionic permeability of gills during physiological transitions. Indeed,

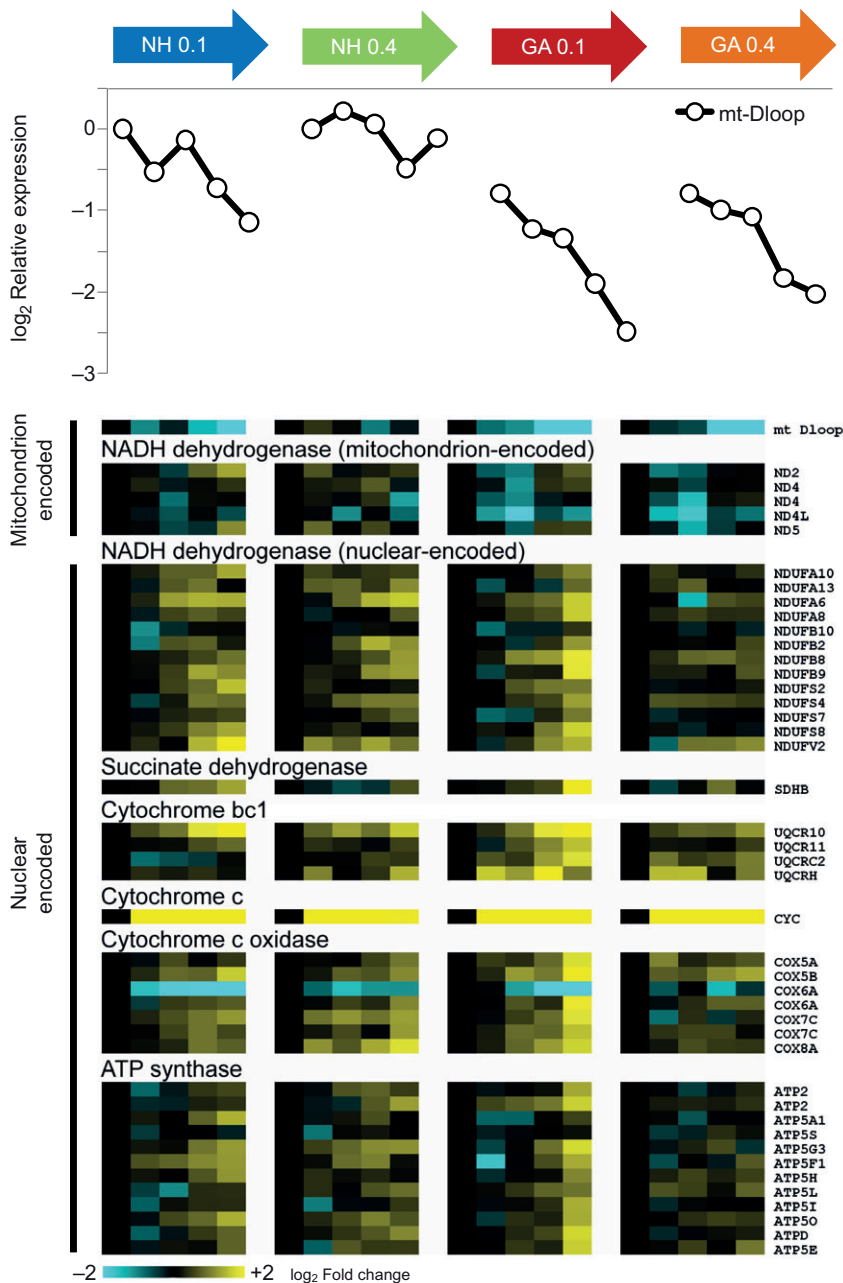

Fig. 5. Expression of a subset of genes associated with the mitochondrion. Line graph represents the expression response for a transcript with perfect sequence match to the mitochondrial D-loop (mt-Dloop). Order of treatments is the same as in Fig. 4. The first row in the heat map represents the same transcript as that shown in the line graph (mt-Dloop). The remaining heatmap genes are components of the mitochondrial electron transport chain and are grouped by those that are encoded in the mitochondrial genome and those that are encoded by the nuclear genome. Transcripts are further grouped by the multi-subunit protein that they assemble into. Cell color and intensity represents the degree of downregulation (blue) or upregulation (yellow) relative to each group's pre-transfer control.

the group of genes showing a consistent time-course response (Fig. 3A) is enriched for genes associated with the gene ontology term 'cell junction', and includes occludin (OCLN) and two additional claudin proteins (CLDN4 and CLDN7) that were quickly upregulated upon hypo-osmotic challenge (Fig. 4I).

One of the most dramatically upregulated genes in our analysis was otopetrin 1 (OTOP1; Fig. 4J). OTOP1 showed a salinity-dependent transcriptional response ( $P=6.0E-12$ ), where expression peaked by 24 h at 0.4 p.p.t. but at 0.1 p.p.t. continued to increase out to 7 days. OTOP1 is a protein that regulates intracellular calcium levels (Hughes et al., 2007), and expression knockdown interferes with otolith development in zebrafish (Hughes et al., 2004). Hypo-osmotic challenge is accompanied by an increase in intracellular calcium during cell swelling in various animal models, implying a role in regulatory volume decrease (Pasantes-Morales et al., 2006), and calcium is important for sensing and signal transduction during osmotic stress in diverse taxa (Fiol and Kültz, 2007). Though the

dramatic salinity-dependent regulation of OTOP1 is intriguing, especially given the important and diverse roles of calcium during osmotic stress, the cellular localization of the protein in fish gills remains unknown, as does its functional relevance for osmotic acclimation.

Focal adhesion kinase (PTK2) downregulation indicated a salinity-dependent trend ( $P=0.08$ ; Fig. 4K) upon hypo-osmotic challenge. The physiological relevance of this is unclear, but is intriguing because FAK phosphorylation is important for regulation of chloride channels during osmotic compensation in killifish MR cells (Marshall et al., 2009), and cystic fibrosis transmembrane conductance regulator chloride channels are deactivated and downregulated in freshwater (Singer et al., 1998).

### Energetics

The physiological transition from a seawater physiology to a freshwater physiology is energetically expensive, estimated to

consume approximately 10% of the total energy budget in *F. heteroclitus* (Kidder et al., 2006a; Kidder et al., 2006b). We observed salinity-dependent upregulation of three probes for creatine kinase (two for CKM and one for CKB; Fig. 4L), as well as of glycogen phosphorylase (PYGM) and glucose-6-phosphate isomerase (GPI), which are involved in carbohydrate metabolism (Fig. 4M). For each of these genes, upregulation was more dramatic or more sustained at 0.1 p.p.t. than at 0.4 p.p.t., indicating that the more severe osmotic stress imposed a greater energetic cost to the animals. Mitochondrial electron transport chain genes were also upregulated, implying an increase in oxidative phosphorylation (see below). Gill PYGM was transiently upregulated in tilapia gills during seawater transfer (Chang et al., 2007), and this response correlated with enhanced gill ATPase activities; genes associated with energy production were also regulated in response to hypo-osmotic challenge in a euryhaline goby (Evans and Somero, 2008). These results attest to the high energetic demands required for the gills to transition between different osmotically induced phenotypes.

#### Mitochondrion function

The core acclimation-associated genes (Fig. 3A) and the set of genes showing a salinity-dependent time-course response (Fig. 3C) were both enriched for genes associated with the gene ontology term 'mitochondrion', including various mitochondrial transport proteins (e.g. TIM8B, TOM40, SLC25A20 and SLC25A13; supplementary material Table S1). Intriguing but difficult to interpret are three observations about regulation of the mitochondrial genome and components of the mitochondrial electron transport chain (mtETC). First, we observed significant downregulation ( $P=3.0E-11$ ) of a transcript with perfect sequence match to the *F. heteroclitus* mitochondrial D-loop (mt-Dloop; Fig. 5, line graph), showing a trend towards salinity dependence ( $P=0.08$ ) and population dependence ( $P=0.05$ ). This mt-Dloop transcript was also downregulated in response to hypoxia, confirmed by quantitative PCR (Flight et al., 2011). Second, we observed a coordinated gradual upregulation of most of the subunits encoding mtETC proteins, consistent with the high demand for ATP during osmotic acclimation (Fig. 5, heat map). However, this trend only applied for mtETC components that are encoded by the nuclear genome; the subset of mtETC transcripts encoded by the mitochondrial genome showed transient downregulation. Mitochondrial genome replication and mitochondrial transcription are both initiated by transcriptional machinery primed in the D-loop (Bonawitz et al., 2006), and D-loop transcripts are adenylated (Sbisà et al., 1990; Vijayasarathy et al., 1995; Camasamudram et al., 2003), so a decrease in D-loop transcript abundance could reflect decreased mtDNA synthesis and/or decreased transcription of the mitochondrial genome. However, this appears inconsistent with our observed increase in expression of components of the mtETC. That is, if mitochondrion abundance decreases, one would expect a parallel decrease in mtETC components. Also curious is the apparent conflict between coordinated upregulation of nuclear-encoded mtETC transcripts but transient downregulation of mitochondrion-encoded mtETC transcripts, as nuclear and mitochondrial regulation of mtETC gene transcription is tightly coordinated in mammals (Scarpulla, 2006) (though this regulation has not been as well studied in fish). Perhaps mitochondrion-encoded transcripts were in fact upregulated in coordination with nuclear-encoded transcripts, but the density of our temporal sampling was insufficient for capturing this coordinated regulation because of the shorter half-life of transcripts that are expressed in the mitochondrion (Murphy and Attardi, 1973; Gelfand and Attardi, 1981). Regulation of mitochondrion turnover and

electron transport during osmotic acclimation merits more focused study because mitochondrion densities differ between seawater and freshwater chloride cells (Laurent et al., 2006), and regulation of ion flux is tightly coupled with electron transport-mediated synthesis of ATP (Bradley and Satir, 1981).

#### Transcription regulation

Genes that are differentially regulated during acclimation were enriched for the gene ontology terms 'transcription regulator activity' ( $P=0.009$ ) and 'transcription factor activity' ( $P=0.02$ ), consistent with the transcriptional response to hypo-osmotic challenge in a euryhaline goby (Evans and Somero, 2008). OSTF2 is a transcription factor that is quickly upregulated in response to hyper-osmotic challenge in tilapia and shares greatest sequence identity with the TSC-22 family of transcription factors (Fiol and Kültz, 2005). Transcripts for the killifish homolog to OSTF2 and killifish TSC22D3 showed coordinated early and transient upregulation upon hypo-osmotic challenge (Fig. 4N), correlated with expression of transcription factor JUNB. Though these transcription factors are quickly upregulated, their precise roles in mediating hypo-osmotic acclimation are unclear. TSC22D3 is induced by glucocorticoids and glucocorticoid receptor is involved in mediating osmotic acclimation (Shaw et al., 2007), and TSC22D3 plays a role in cellular protection from apoptosis (Asselin-Labat et al., 2004). Because OSTF1 contains putative binding sites for cyclin-dependent kinase 1 (CDK1) and MAP kinases, it may be involved in regulation of the cell cycle and apoptosis. JUNB can be activated by mechanical changes in membrane shape during hypo-osmotic exposure (Rauch et al., 2002), and expression is induced by hypo-osmotic exposure in keratin-defective epithelial cells along with a group of transcription factors that contribute to cell cycle regulation (Liovic et al., 2008). Perhaps regulation of these transcription factors is protective, where temporary growth arrest permits repair and prevents proliferation of damaged cells (Liovic et al., 2008). Iodothyronine deiodinase is not a transcription factor, but is the major activator of thyroid hormone, which is a well-known activator of transcription. Though the role of thyroid hormone in osmoregulation is controversial (McCormick, 2001), we found significant population-dependent upregulation of iodothyronine deiodinase 1 (DIO1; Fig. 4O), suggesting a role in salinity acclimation that may contribute to explaining observed population variation in hypo-osmotic tolerance (Fig. 1), consistent with adaptive divergence in expression reported in Whitehead et al. (Whitehead et al., 2011a). DIO proteins are important for the activation and deactivation of thyroid hormones (Orozco and Valverde-R, 2005). Members of the DIO family have been cloned from fish gills (Sanders et al., 1999), contain osmotic response elements in promoter regions in killifish (Lopez-Bojorquez et al., 2007), and deiodination activity is detectable in killifish gills (Orozco et al., 2000). Intriguingly, thyroid hormone signaling pathways have adaptively diverged between marine and freshwater populations of stickleback (Kitano et al., 2010).

The transcription factors HES1 and SPI1 were downregulated in response to hypo-osmotic challenge (Fig. 4P). HES1 is a transcriptional repressor and an effector of the notch-signaling pathway. Notch signaling is important for regulating proliferation and differentiation decisions and cell fate, where signaling can either inhibit or induce differentiation. HES1 regulation may reflect the involvement of notch signaling in the gill tissue remodeling that we observe. SPI1 is a transcription factor that regulates haematopoiesis, but also upregulates expression of cyclin D2 (Vicari et al., 2006), which also is important for cell-cycle regulation and cell proliferation.



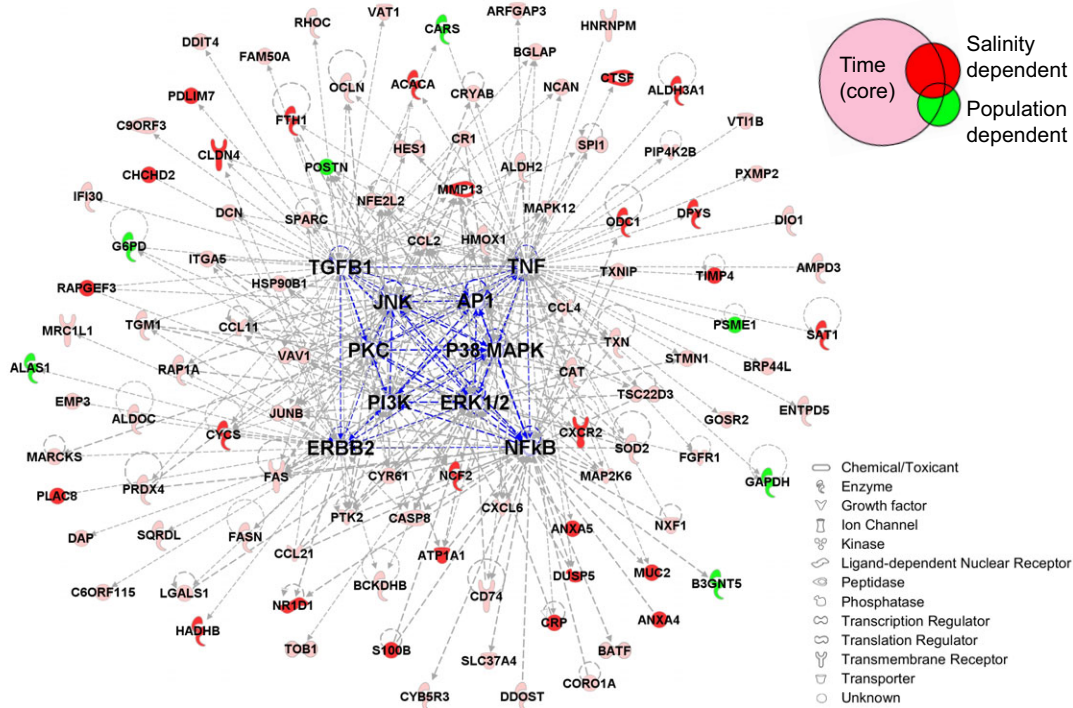

Fig. 6. Interaction network of genes, united by a highly connected cluster of 10 MAP kinase and cytokine hubs, that is not enriched for genes with salinity- or population-dependent expression. Each gene is identified by name, where the underlying symbol indicates the function (see figure key), and the color represents results from statistical tests: pink fill indicates genes with a 'core' time-course response that is common across all treatments (no interaction with population or salinity; see Venn diagram); red fill indicates genes with a salinity-dependent time-course response; and green fill indicates genes with a population-dependent time-course response. Blue lines represent connections among hubs, and gray lines represent connections between hubs and genes from our analysis.

### Apoptosis

Many genes involved in apoptosis were regulated in response to hypo-osmotic challenge, but gene ontology terms associated with 'apoptosis' were not enriched in our set of time-course responsive genes. The role of apoptosis during osmotic acclimation in fish gills is not clear. Change in intracellular potassium concentration, which is a key component of regulatory volume decrease following cell swelling (Chara et al., 2011), can trigger apoptosis (Bortner et al., 1997). However, upon hypo-osmotic challenge, killifish may suppress apoptosis to allow regulatory volume decrease to proceed followed by cellular remodeling, or may activate apoptosis if regulatory volume decrease is ineffective and cells start to accumulate damage. Laurent et al. (Laurent et al., 2006) suggested that during freshwater acclimation, seawater-type mitochondrion-rich cells may be eliminated by apoptosis, necrosis or exfoliation, or that they may be simply covered over by neighboring pavement cells. Many biochemical pathways can mediate apoptosis and signaling can be complicated and cell-type dependent (Strasser et al., 2000), and in the present study we found both upregulation and downregulation of several key pro-apoptotic genes, making broad interpretations difficult. However, considering the importance of tissue remodeling necessary for acclimation, and that osmotic stress-responsive signaling pathways are associated with apoptosis (Kültz and Avila, 2001), including those implicated in our network analysis (see below), we propose that regulation of apoptosis may be an important component of hypo-osmotic acclimation in killifish, a proposition that merits more focused study.

We observed significant regulation of several key mediators of apoptosis. Cytochrome *c* (CYC) transcription was rapidly

upregulated by 6 h ( $P=1E-27$ ; Fig. 4Q), was population ( $P=0.0005$ ) and salinity dependent ( $P=0.0001$ ), and time-course expression across populations and salinities was highly correlated with other genes associated with cell volume regulatory phenomena (e.g. AQP3 and ODC1; Fig. 4A,C). Release of mature CYC protein from the mitochondrion is a key trigger for apoptosis through enhanced activation of caspase, and upregulation of CYC transcription precedes induction of apoptosis (Chandra et al., 2002). In killifish, caspase-8 (CASP8) expression showed population-dependent upregulation (Fig. 4R) upon hypo-osmotic challenge. CASP8 is a key regulator of the apoptotic cascade, is centrally located within the network of apoptotic machinery components (Di Pietro et al., 2009), and increased expression is associated with enhanced sensitivity to apoptosis (Jiang et al., 2008). Cyclin-dependent kinase 1 (CDK1) upregulation was correlated with CASP8 expression (Fig. 4R). Activity of CDK1 is regulated by transcription and phosphorylation, and CDK1 activation is linked to both cell-cycle regulation and regulation of apoptosis (Castedo et al., 2002). Transcripts for the protein FADD and the apoptosis regulatory protein Siva (SIVA1) were both downregulated during the acclimation time course (Fig. 4S). FADD is pro-apoptotic through CASP8 activation, and SIVA1 is also pro-apoptotic through the caspase-dependent pathway (Py et al., 2004).

### Network analysis

We exploited gene and protein interaction network analyses as an exploratory tool for revealing regulatory pathways that may activate and coordinate the complex genomic responses that facilitate physiological acclimation. Network analysis seeks connections

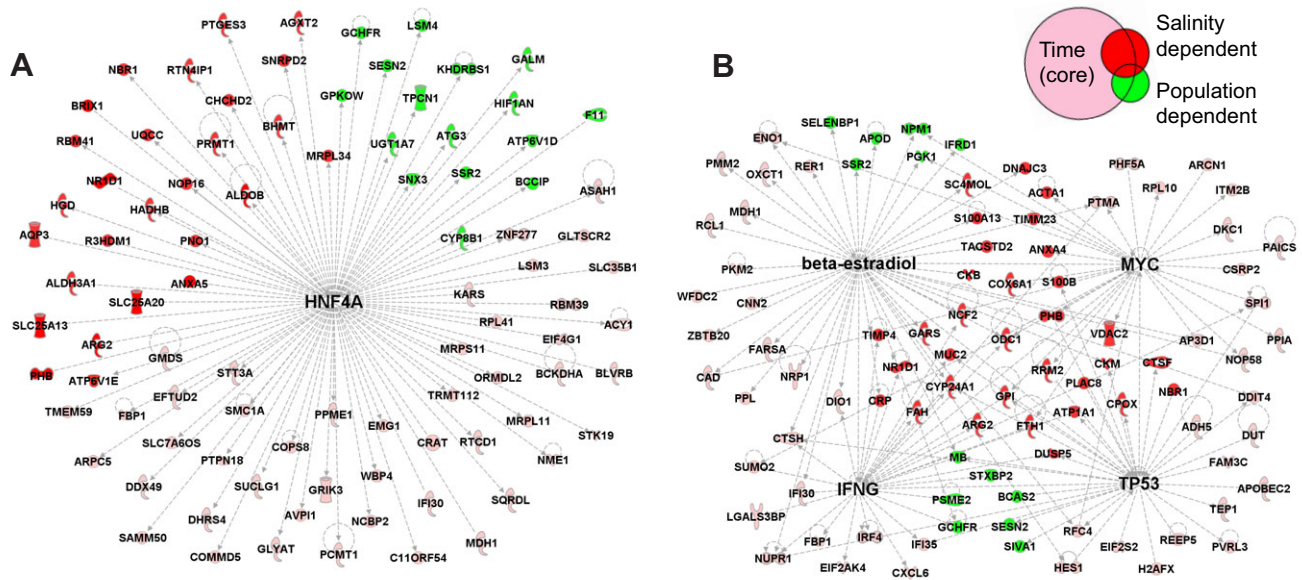

Fig. 7. Two networks that are enriched for genes showing salinity- or population-dependent expression. (A) Network with HNF4A as the hub; (B) network with beta-estradiol, MYC, TP53 and IFNG forming an interconnected hub. Each gene is identified by name, and the symbols and colors are as described in Fig. 6.

between genes of interest often from experimental evidence, such as protein–protein interactions or protein–nucleic acid interactions, to provide greater scope for biological systems-level functional inference. We focused on connections among three sets of genes: (1) genes that showed a common (‘core’) transcriptional response during acclimation (‘time’ main effect with no population or salinity interaction), (2) genes that showed a salinity-dependent time-course response (interaction between ‘time’ and ‘salinity’ main effects), and (3) genes that showed a population-dependent time-course response (interaction between ‘time’ and ‘population’ main effects). These are the three sets of genes represented by different heat maps in Fig. 3, but for network analysis we included only the subset of genes with functional annotation. We identified hubs that united more than 15 of these genes into an interaction network with one degree of separation. Onto each network we mapped whether each gene showed a ‘core’ transcriptional time-course response (pink symbols; Fig. 6), a salinity-dependent time-course response (red symbols) or a population-dependent time-course (green symbols). We expected this analysis to reveal well-known osmotic stress response pathways, but in particular we were interested in identifying the subset of hubs that were significantly enriched for genes with salinity- and population-dependent expression; regulation from these hubs may be particularly important for imparting the extreme physiological plasticity observed in *F. heteroclitus*.

One major cluster of highly connected hubs included well-known components of the cytokine and kinase cellular signaling pathways (Fig. 6). This, the largest cluster that emerged from our analysis, united 12% of the time-course responsive genes, but was not significantly enriched for genes with salinity- or population-dependent expression ( $P=0.12$ ). This network links 10 hubs, including cytokines TGF- $\beta$ 1 and TNF $\alpha$ , the receptor tyrosine kinase ERBB2, phosphatidylinositol 3-kinase (PI3K), the protein kinases PKC, JNK, ERK1/2 and P38 MAPK, and the transcription factors NF $\kappa$ B and AP-1, and each of these hubs is highly connected with one another (blue dashed lines; Fig. 6). Many of these hubs are well-known components of osmotic stress response pathways, confirming the validity of our networking approach. For example,

cell swelling upon hypo-osmotic challenge activates stress-activated protein kinases (Nisato et al., 1999), and MAPK-mediated signaling regulates the cell cycle as an important component of the osmotic stress response (Kültz and Burg, 1998). Indeed, osmotic challenge quickly regulates ERK1, JNK and P38 MAPK protein abundance in killifish gill and opercular epithelium (Kültz and Avila, 2001; Marshall et al., 2005), hypo-osmotic challenge has been shown to induce MAPK signaling in an estuarine goby (Evans and Somero, 2008) and MAPK signaling has been shown to affect regulatory volume decrease in various other fish models (reviewed in Chara et al., 2011).

In addition to MAPK signaling, other inter-connected signaling pathways including TGF- $\beta$  and TNF $\alpha$ /NF $\kappa$ B are also involved in cell proliferation, cell differentiation and cell death (Massague, 1998; Liu, 2005). Intriguingly, only one base pair distinguishes the osmotic response element (ORE) and the NF $\kappa$ B binding sites, and Iwata et al. (Iwata et al., 1999) found that TNF $\alpha$  induces aldose reductase by stimulating NF $\kappa$ B binding to the ORE of aldose reductase. Perhaps TNF $\alpha$ /NF $\kappa$ B activation can stimulate expression of other genes with ORE binding sites. TNF $\alpha$  affects tight-junction permeability (Johnson, 2006), which in turn regulates ion efflux from gill epithelia in hypo-osmotic conditions. TNF $\alpha$  is involved in cellular localization of occludin (Sappington et al., 2003), decreases expression of rat occludin in sertoli cells (Siu et al., 2003) and downregulates occludin in astrocytes (Wachtel et al., 2001). JUNB expression was quickly upregulated upon hypo-osmotic challenge (Fig. 4N) and increased JUNB transcription is a sensitive and early genomic response in cells stimulated by TGF- $\beta$ 1 (Pertovaara et al., 1989). JUNB induction accompanies TGF- $\beta$ 1-mediated induction of ODC in H-ras transformed cell lines (Hurta et al., 1993), and this pattern of co-expression between ODC and JUNB was observed in our data as well (Fig. 4C,N).

This network (Fig. 6) is also enriched for genes involved in regulation of apoptosis ( $P=0.006$ ). MAP kinases are well-known mediators of cell death through activation of apoptotic cascades. TNF $\alpha$  can also induce apoptosis by triggering activation of CASP8, and osmotic stress can induce TNF $\alpha$ -mediated apoptosis in human

cell lines (Franco et al., 2002). In contrast, NF $\kappa$ B can play anti-apoptotic roles through activation of apoptosis inhibitors (Liu, 2005). Again, the fact that molecular signaling governing apoptosis is enormously complicated makes it difficult to conclude activation or repression from transcript profiling alone. However, given the necessary damage control and tissue remodeling necessary for hypo-osmotic acclimation, observed changes in transcript abundance for key mediators of apoptosis (Fig. 4Q–S), and implication of signaling pathways known to be key mediators of cell death (Fig. 6), regulation of apoptosis may be an important component of hypo-osmotic acclimation in killifish and merits more focused study.

Our analysis revealed two sets of hubs that were enriched for genes showing salinity- and/or population-dependent patterns of expression during acclimation to hypo-osmotic challenge. Of all the hubs identified in our analysis, HNF-4 $\alpha$  united the most genes (11% of the genes included in this analysis), and this network was the most significantly enriched for genes showing salinity- ( $P=0.0004$ ) and population-dependent expression ( $P=0.0009$ ; Fig. 7A). HNF-4 $\alpha$  is a transcription factor crucial for liver development, though it is expressed in some mammalian osmoregulatory tissues, such as kidney and intestine, for which its function remains to be determined (Grigo et al., 2008). The gene is also expressed in fish gill, where zinc deficiency induces transcription of HNF-4 $\alpha$  and of genes enriched with HNF-4 $\alpha$  binding elements (Zheng et al., 2010). Though a role in fish osmoregulation is novel, a homolog of HNF-4 $\alpha$  appears crucial for coordinating osmoregulatory functions of excretory cells in nematode worms. In *Caenorhabditis elegans*, HNF-4 $\alpha$  regulates the expression of many subunits of the vacuolar ATPase (vATPase) (Hahn-Windgassen and Van Gilst, 2009). The vATPases are proton pumps that are found in all eukaryotes (Finbow and Harrison, 1997), and in fish gills they are important in energizing transepithelial Na<sup>+</sup> uptake in freshwater-acclimated fish and in acid–base balance. In *C. elegans*, RNA interference of HNF-4 $\alpha$  compromises the animal's ability to compensate for acute osmotic stress (Hahn-Windgassen and Van Gilst, 2009). In *F. heteroclitus*, we detected salinity-dependent regulation of ATP6V1E1 (Fig. 4G) and population-dependent regulation of ATP6V1D (supplementary material Table S1).

A second set of mutually connected hubs, including the hormone  $\beta$ -estradiol, transcription factors MYC and TP53, and cytokine interferon-gamma (IFNG), was significantly enriched for genes with salinity- ( $P=0.0001$ ) and population-dependent ( $P=0.013$ ) expression (Fig. 7B). Estradiol injection typically has inhibitory effects of osmoregulatory capacity in fish (McCormick, 1995), including killifish (Mancera et al., 2004). Consistent with this, transcript for estradiol 17 $\beta$ -dehydrogenase, which catalyzes the synthesis of estradiol, was significantly decreased upon hypo-osmotic challenge in a euryhaline goby (Evans and Somero, 2008). IFNG is a cytokine primarily involved in regulation of immune system genes in macrophages, but it also exhibits anti-proliferative and pro-apoptotic functions (Schroder et al., 2004). Similarly, transcription factor TP53 affects cell fate and proliferation by inducing growth arrest or apoptosis. MYC also regulates cell growth, cell proliferation and apoptosis, and has been shown to be downregulated upon hypo-osmotic challenge in two species of mussel (Lockwood and Somero, 2011).

It is important to note that all of the sets of hubs highlighted in (Figs 6, 7) are interconnected (Fig. 8A). Interestingly, the least connected hub is HNF-4 $\alpha$ , which is also the hub most significantly enriched for genes with salinity- and population-dependent expression, and is the only hub to unite more of the genes included in our analysis than expected by chance (Fig. 8B). Perhaps this

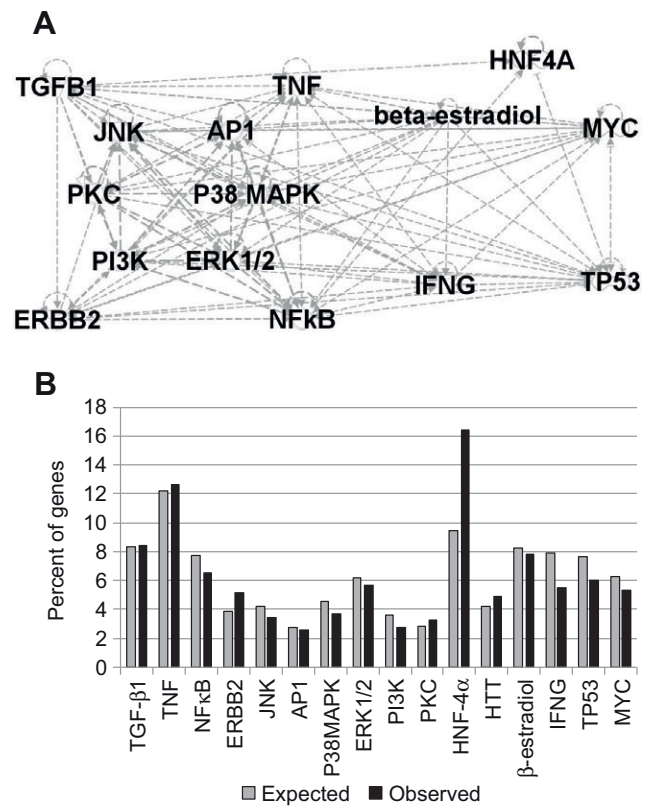

Fig. 8. Relationships among hubs identified in our analysis. (A) Network uniting the hubs identified in our analysis (Figs 6, 7). (B) Proportion of genes expected to be connected to each hub identified in our analysis (gray bars) compared with observed proportion of genes connected to each hub (black bars). The expected proportion was estimated based on the number of genes with connections to the query gene within the Ingenuity Pathway Analysis database.

relative lack of interconnectedness with other hubs that are responsive to osmotic challenge is associated with salinity-dependent flexibility in response of HNF-4 $\alpha$  signaling, and with the likelihood of divergence of that signaling response among populations. Indeed, less connected components of molecular networks appear subject to fewer selective constraints than highly connected components, facilitating ‘evolvability’ (Yamada and Bork, 2009).

#### Evolution by natural selection

In addition to non-transcriptional responses (such as protein phosphorylation), it is clear that regulation of genome expression at the transcriptional level is a key mediator of acclimation to changing osmotic environments. In the experiments described here, two populations of killifish differ in their abilities to compensate for osmotic challenge (Fig. 1), in the capacity of their gill epithelia to transition into a freshwater state, and in their differential expression of genes. Most of the genes highlighted above are expressed differently between the NH and GA populations, and this divergence could have been governed by neutral or adaptive evolutionary forces (Whitehead and Crawford, 2006a; Whitehead and Crawford, 2006b). That alternate osmotic physiologies have evolved repeatedly and quickly within the genus (Whitehead, 2010) implies that the genomic mechanisms that govern osmoregulation can also evolve quickly. One might predict that for genes whose expression regulation is particularly important for osmotic acclimation, adaptive forces should govern their divergence among

populations that have adapted to different osmotic environments. It is unclear whether increased freshwater tolerance is currently or historically adaptive in the coastal NH population. However, expression patterns for many of the genes highlighted above (AQP3, ATP1A1, CYC, DIO1, HES1, IMPA1, JUNB, ODC1, OSTF1, SBP, TGM1, TSC22D3 and VCAN) appear to have diverged by adaptive evolutionary mechanisms among populations of killifish distributed along a natural salinity gradient (Whitehead et al., 2011a). That is, many of these genes show patterns of adaptive divergence in gene expression in populations that occupy exclusively freshwater habitats and that have derived adaptive physiological acclimation to hypo-osmotic challenge. This emphasizes the physiological importance of expression regulation during acclimation for these genes.

### ACKNOWLEDGEMENTS

Thanks to Benjamin Dubansky, Michael Truax, Lee McChesney, John Waldron and Alex Whelan for assistance with animal care.

### FUNDING

This research was funded by National Science Foundation grants EF-0723771 [to A.W. and F.G.] and BES-0652006 [to A.W.].

### REFERENCES

- Asselin-Labat, M.-L., David, M., Biola-Vidamment, A., Lecoeuche, D., Zennaro, M.-C., Bertoglio, J. and Pallardy, M. (2004). GILZ, a new target for the transcription factor FoxO3, protects T lymphocytes from interleukin-2 withdrawal-induced apoptosis. *Blood* **104**, 215-223.
- Bagherie-Lachidan, M., Wright, S. I. and Kelly, S. P. (2008). Claudin-3 tight junction proteins in *Tetraodon nigroviridis*: cloning, tissue-specific expression, and a role in hydromineral balance. *Am. J. Physiol. Regul. Integr. Comp. Physiol.* **294**, R1638-R1647.
- Bonawitz, N. D., Clayton, D. A. and Shadel, G. S. (2006). Initiation and beyond: multiple functions of the human mitochondrial transcription machinery. *Mol. Cell* **24**, 813-825.
- Bortner, C. D., Hughes, F. M. and Cidowski, J. A. (1997). A primary role for K<sup>+</sup> and Na<sup>+</sup> efflux in the activation of apoptosis. *J. Biol. Chem.* **272**, 32436-32442.
- Bradley, T. and Satir, P. (1981). 5-hydroxytryptamine-stimulated mitochondrial movement and microvillar growth in the lower malpighian tubule of the insect, *Rhodnius prolixus*. *J. Cell Sci.* **49**, 139-161.
- Bui, P., Bagherie-Lachidan, M. and Kelly, S. P. (2010). Cortisol differentially alters claudin isoforms in cultured puffer fish gill epithelia. *Mol. Cell. Endocrinol.* **317**, 120-126.
- Burnett, K. G., Bain, L. J., Baldwin, W. S., Callard, G. V., Cohen, S., Di Giulio, R. T., Evans, D. H., Gómez-Chiarri, M., Hahn, M. E., Hoover, C. A. et al. (2007). *Fundulus* as the premier teleost model in environmental biology: Opportunities for new insights using genomics. *Comp. Biochem. Physiol.* **2D**, 257-286.
- Camasamudram, V., Fang, J. K. and Avadhani, N. G. (2003). Transcription termination at the mouse mitochondrial H-strand promoter distal site requires an A/T rich sequence motif and sequence specific DNA binding proteins. *Eur. J. Biochem.* **270**, 1128-1140.
- Capp, M. W., Cayley, D. S., Zhang, W. T., Guttman, H. J., Melcher, S. E., Saecker, R. M., Anderson, C. F. and Record, M. T. (1996). Compensating effects of opposing changes in putrescine (2+) and K<sup>+</sup> Concentrations on lac repressor-lac operator binding: *in vitro* thermodynamic analysis and *in vivo* relevance. *J. Mol. Biol.* **258**, 25-36.
- Castedo, M., Perfettini, J. L., Roumier, T. and Kroemer, G. (2002). Cyclin-dependent kinase-1: linking apoptosis to cell cycle and mitotic catastrophe. *Cell Death Differ.* **9**, 1287-1293.
- Cerda, J. and Finn, R. N. (2010). Piscine aquaporins: an overview of recent advances. *J. Exp. Zool. A* **313**, 623-650.
- Chandra, D., Liu, J.-W. and Tang, D. G. (2002). Early mitochondrial activation and cytochrome *c* up-regulation during apoptosis. *J. Biol. Chem.* **277**, 50842-50854.
- Chang, J. C. H., Wu, S. M., Tseng, Y. C., Lee, Y. C., Baba, O. and Hwang, P. P. (2007). Regulation of glycogen metabolism in gills and liver of the euryhaline tilapia (*Oreochromis mossambicus*) during acclimation to seawater. *J. Exp. Biol.* **210**, 3494-3504.
- Chara, O., Espelt, M. V., Krumschnabel, G. and Schwarzbaum, P. J. (2011). Regulatory volume decrease and P receptor signaling in fish cells: mechanisms, physiology, and modeling approaches. *J. Exp. Zool. A* **315**, 175-202.
- Chen, Q., Peng, H., Lei, L., Zhang, Y., Kuang, H., Cao, Y., Shi, Q., Ma, T. and Duan, E. (2011). Aquaporin3 is a sperm water channel essential for postcopulatory sperm osmoadaptation and migration. *Cell Res.* **21**, 922-933.
- Clelland, E. S., Bui, P., Bagherie-Lachidan, M. and Kelly, S. P. (2010). Spatial and salinity-induced alterations in claudin-3 isoform mRNA along the gastrointestinal tract of the pufferfish *Tetraodon nigroviridis*. *Comp. Biochem. Physiol.* **155A**, 154-163.
- Copeland, D. E. (1950). Adaptive behavior of the chloride cell in the gill of *Fundulus heteroclitus*. *J. Morphol.* **87**, 369-379.
- Cutler, C. P. and Cramb, G. (2002). Branchial expression of an aquaporin 3 (AQP-3) homologue is downregulated in the European eel *Anguilla anguilla* following seawater acclimation. *J. Exp. Biol.* **205**, 2643-2651.
- Di Pietro, C., Ragusa, M., Barbagallo, D., Duro, L. R., Guglielmino, M. R., Majorana, A., Angelica, R., Scalia, M., Stalio, L., Saito, L. et al. (2009). The apoptotic machinery as a biological complex system: analysis of its omics and evolution, identification of candidate genes for fourteen major types of cancer, and experimental validation in CML and neuroblastoma. *BMC Med. Genomics* **2**, 20.
- Duvernell, D. D., Lindmeier, J. B., Faust, K. E. and Whitehead, A. (2008). Relative influences of historical and contemporary forces shaping the distribution of genetic variation in the Atlantic killifish, *Fundulus heteroclitus*. *Mol. Ecol.* **17**, 1344-1360.
- Evans, T. G. and Somero, G. N. (2008). A microarray-based transcriptomic time-course of hyper- and hypo-osmotic stress signaling events in the euryhaline fish *Gillichthys mirabilis*: osmosensors to effectors. *J. Exp. Biol.* **211**, 3636-3649.
- Faggian, J., Fosang, A. J., Zieba, M., Wallace, M. J. and Hooper, S. B. (2007). Changes in versican and chondroitin sulfate proteoglycans during structural development of the lung. *Am. J. Physiol. Regul. Integr. Comp. Physiol.* **293**, R784-R792.
- Finan, J. D. and Guilak, F. (2010). The effects of osmotic stress on the structure and function of the cell nucleus. *J. Cell. Biochem.* **109**, 460-467.
- Finbow, M. E. and Harrison, M. A. (1997). The vacuolar H<sup>+</sup>-ATPase: a universal proton pump of eukaryotes. *Biochem. J.* **324**, 697-712.
- Fiol, D. F. and Kültz, D. (2005). Rapid hyperosmotic coinduction of two tilapia (*Oreochromis mossambicus*) transcription factors in gill cells. *Proc. Natl. Acad. Sci. USA* **102**, 927-932.
- Fiol, D. F. and Kültz, D. (2007). Osmotic stress sensing and signaling in fishes. *FEBS J.* **274**, 5790-5798.
- Flight, P. A., Nacci, D., Champlin, D., Whitehead, A. and Rand, D. M. (2011). The effects of mitochondrial genotype on hypoxic survival and gene expression in a hybrid population of the killifish, *Fundulus heteroclitus*. *Mol. Ecol.* **20**, 4503-4520.
- Franco, D., Nojek, I. M., Molinero, L., Coso, O. A. and Costas, M. A. (2002). Osmotic stress sensitizes naturally resistant cells to TNF-alpha-induced apoptosis. *Cell Death Differ.* **9**, 1090-1098.
- Gelfand, R. and Attardi, G. (1981). Synthesis and turnover of mitochondrial ribonucleic acid in HeLa cells: the mature ribosomal and messenger ribonucleic acid species are metabolically unstable. *Mol. Cell. Biol.* **1**, 497-511.
- Griffith, R. W. (1974). Environment and salinity tolerance in the genus *Fundulus*. *Copeia* **1974**, 319-331.
- Grigo, K., Wirsing, A., Lucas, B., Klein-Hitpass, L. and Ryffel, G. U. (2008). HNF4 alpha orchestrates a set of 14 genes to down-regulate cell proliferation in kidney cells. *Biol. Chem.* **389**, 179-187.
- Hahn-Windgassen, A. and Van Gilst, M. R. (2009). The *Caenorhabditis elegans* HNF4 alpha homolog, NHR-31, mediates excretory tube growth and function through coordinate regulation of the vacuolar ATPase. *PLoS Genet.* **5**, e1000553.
- Hochachka, P. W. and Somero, G. N. (2002). *Biochemical Adaptation: Mechanism and Process in Physiological Evolution*. New York: Oxford University Press.
- Huang, D. W., Sherman, B. T. and Lempicki, R. A. (2009). Systematic and integrative analysis of large gene lists using DAVID bioinformatics resources. *Nat. Protoc.* **4**, 44-57.
- Hughes, I., Blasiole, L., Huss, D., Warchol, M. E., Rath, N. P., Hurler, B., Ignatova, E., Dickman, J. D., Thalmann, R., Levenson, R. et al. (2004). Otopetrin 1 is required for otolith formation in the zebrafish *Danio rerio*. *Dev. Biol.* **276**, 391-402.
- Hughes, I., Saito, M., Schlesinger, P. H. and Ornitz, D. M. (2007). Otopetrin 1 activation by purinergic nucleotides regulates intracellular calcium. *Proc. Natl. Acad. Sci. USA* **104**, 12023-12028.
- Hurta, R. A. R., Greenberg, A. H. and Wright, J. A. (1993). Transforming growth factor-beta(1) selectively regulates ornithine decarboxylase gene-expression in malignant H-ras transformed fibrosarcoma cell-lines. *J. Cell. Physiol.* **156**, 272-279.
- Iwata, T., Sato, S., Jimenez, J., McGowan, M., Moroni, M., Dey, A., Ibaraki, N., Reddy, V. N. and Carper, D. (1999). Osmotic response element is required for the induction of aldose reductase by tumor necrosis factor-alpha. *J. Biol. Chem.* **274**, 7993-8001.
- Jiang, M. R., Zhu, K. J., Grenet, J. and Lahti, J. M. (2008). Retinoic acid induces caspase-8 transcription via phospho-CREB and increases apoptotic responses to death stimuli in neuroblastoma cells. *Biochim. Biophys. Acta Mol. Cell Res.* **1783**, 1055-1067.
- Johnson, L. R. (2006). *Physiology of the Gastrointestinal Tract*. Burlington, MA: Elsevier Academic Press.
- Kidder, G. W., Petersen, C. W. and Preston, R. L. (2006a). Energetics of osmoregulation: I. Oxygen consumption by *Fundulus heteroclitus*. *J. Exp. Zool. A* **305**, 309-317.
- Kidder, G. W., Petersen, C. W. and Preston, R. L. (2006b). Energetics of osmoregulation: II. Water flux and osmoregulatory work in the euryhaline fish, *Fundulus heteroclitus*. *J. Exp. Zool. A* **305**, 318-327.
- Kitano, J., Lema, S. C., Luckenbach, J. A., Mori, S., Kawagishi, Y., Kusakabe, M., Swanson, P. and Peichel, C. L. (2010). Adaptive divergence in the thyroid hormone signaling pathway in the stickleback radiation. *Curr. Biol.* **20**, 2124-2130.
- Kültz, D. and Avila, K. (2001). Mitogen-activated protein kinases are *in vivo* transducers of osmosensory signals in fish gill cells. *Comp. Biochem. Physiol.* **129B**, 821-829.
- Kültz, D. and Burg, M. (1998). Evolution of osmotic stress signaling via MAP kinase cascades. *J. Exp. Biol.* **201**, 3015-3021.
- Laurent, P., Chevalier, C. and Wood, C. M. (2006). Appearance of cuboidal cells in relation to salinity in gills of *Fundulus heteroclitus*, a species exhibiting branchial Na<sup>+</sup> but not Cl<sup>-</sup> uptake in freshwater. *Cell Tissue Res.* **325**, 481-492.
- Lignot, J. H., Cutler, C. P., Hazon, N. and Cramb, G. (2002). Immunolocalisation of aquaporin 3 in the gill and the gastrointestinal tract of the European eel *Anguilla anguilla* (L.). *J. Exp. Biol.* **205**, 2653-2663.
- Liovic, M., Lee, B., Tomic-Canic, M., D'Alessandro, M., Bolshakov, V. N. and Lane, B. (2008). Dual-specificity phosphatases in the hypo-osmotic stress response of keratin-defective epithelial cell lines. *Exp. Cell Res.* **314**, 2066-2075.
- Liu, Z.-G. (2005). Molecular mechanism of TNF signaling and beyond. *Cell Res.* **15**, 24-27.

- Lockwood, B. L. and Somero, G. N. (2011). Transcriptomic responses to salinity stress in invasive and native blue mussels (genus *Mytilus*). *Mol. Ecol.* **20**, 517-529.
- Lopez-Bojorquez, L., Villalobos, P., Garcia-G, C., Orozco, A. and Valverde-R, C. (2007). Functional identification of an osmotic response element (ORE) in the promoter region of the killifish deiodinase 2 gene (FhDio2). *J. Exp. Biol.* **210**, 3126-3132.
- Mancera, J. M., Smolenaars, M., Laiz-Carrión, R., Martín del Río, M. d. P., Bonga, S. E. W. and Flik, G. (2004). 17[ $\beta$ ]-Estradiol affects osmoregulation in *Fundulus heteroclitus*. *Comp. Biochem. Physiol.* **139B**, 183-191.
- Marshall, W. S., Ossum, C. G. and Hoffmann, E. K. (2005). Hypotonic shock mediation by p38 MAPK, JNK, PKC, FAK, OSR1 and SPAK in osmosensing chloride secreting cells of killifish opercular epithelium. *J. Exp. Biol.* **208**, 1063-1077.
- Marshall, W. S., Watters, K. D., Hovdestad, L. R., Cozzi, R. R. F. and Katoh, F. (2009). CFTR Cl<sup>-</sup> channel functional regulation by phosphorylation of focal adhesion kinase at tyrosine 407 in osmosensitive ion transporting mitochondria rich cells of euryhaline killifish. *J. Exp. Biol.* **212**, 2365-2377.
- Massagué, J. (1998). TGF- $\beta$  signal transduction. *Annu. Rev. Biochem.* **67**, 753-791.
- McCormick, S. D. (1995). Hormonal control of gill Na<sup>+</sup>, K<sup>+</sup>-ATPase and chloride cell function. In *Cellular and Molecular Approaches to Fish Ionic Regulation*, Vol. 14 (ed. C. M. Wood and T. J. Shuttleworth), pp. 285-315. San Diego, CA: Academic Press.
- McCormick, S. D. (2001). Endocrine control of osmoregulation in teleost fish. *Am. Zool.* **41**, 781-794.
- Michell, R. H. (2008). Inositol derivatives: evolution and functions. *Nat. Rev. Mol. Cell Biol.* **9**, 151-161.
- Murphy, W. and Attardi, G. (1973). Stability of cytoplasmic messenger RNA in HeLa cells. *Proc. Natl. Acad. Sci. USA* **70**, 115-119.
- Niisato, N., Post, M., Van Driessche, W. and Marunaka, Y. (1999). Cell swelling activates stress-activated protein kinases, p38 MAP kinase and JNK, in renal epithelial A6 cells. *Biochem. Biophys. Res. Commun.* **266**, 547-550.
- Orozco, A. and Valverde-R, C. (2005). Thyroid hormone deiodination in fish. *Thyroid* **15**, 799-813.
- Orozco, A., Linsler, P. and Valverde-R, C. (2000). Kinetic characterization of outer-ring deiodinase activity (ORD) in the liver, gill and retina of the killifish *Fundulus heteroclitus*. *Comp. Biochem. Physiol.* **126B**, 283-290.
- Pasantes-Morales, H., Lezama, R. A., Ramos-Mandujano, G. and Tuz, K. L. (2006). Mechanisms of cell volume regulation in hypo-osmolality. *Am. J. Med.* **119**, S4-S11.
- Patrick, M. L. and Wood, C. M. (1999). Ion and acid-base regulation in the freshwater mummichog (*Fundulus heteroclitus*): a departure from the standard model for freshwater teleosts. *Comp. Biochem. Physiol.* **122A**, 445-456.
- Patrick, M. L., Part, P., Marshall, W. S. and Wood, C. M. (1997). Characterization of ion and acid-base transport in the fresh water adapted mummichog (*Fundulus heteroclitus*). *J. Exp. Zool.* **279**, 208-219.
- Pertovaara, L., Sistonen, L., Bos, T. J., Vogt, P. K., Keskiöja, J. and Alitalo, K. (1989). Enhanced jun gene expression is an early genomic response to transforming growth factor beta stimulation. *Mol. Cell. Biol.* **9**, 1255-1262.
- Philpott, C. W. and Copeland, D. E. (1963). Fine structure of chloride cells from three species of *Fundulus*. *J. Cell Biol.* **18**, 389-404.
- Py, B., Slomianny, C., Auberger, P., Petit, P. X. and Benichou, S. (2004). Siva-1 and an alternative splice form lacking the death domain, Siva-2, similarly induce apoptosis in T lymphocytes via a caspase-dependent mitochondrial pathway. *J. Immunol.* **172**, 4008-4017.
- Rauch, C., Brunet, A. C., Deleule, J. and Farge, E. (2002). C2C12 myoblast/osteoblast transdifferentiation steps enhanced by epigenetic inhibition of BMP2 endocytosis. *Am. J. Physiol. Cell Physiol.* **283**, C235-C243.
- Rhee, H. J., Kim, E. J. and Lee, J. K. (2007). Physiological polyamines: simple primordial stress molecules. *J. Cell. Mol. Med.* **11**, 685-703.
- Sanders, J. P., Van der Geyten, S., Kaptein, E., Darras, V. M., Kuhn, E. R., Leonard, J. L. and Visser, T. J. (1999). Cloning and characterization of type III iodothyronine deiodinase from the fish *Oreochromis niloticus*. *Endocrinology* **140**, 3666-3673.
- Sappington, P. L., Han, X. N., Yang, R. K., Delude, R. L. and Fink, M. P. (2003). Ethyl pyruvate ameliorates intestinal epithelial barrier dysfunction in endotoxemic mice and immunostimulated Caco-2 enterocytic monolayers. *J. Pharmacol. Exp. Ther.* **304**, 464-476.
- Sbisà, E., Nardelli, M., Tanzariello, F., Tullo, A. and Saccone, C. (1990). The complete and symmetric transcription of the main noncoding region of rat mitochondrial genome – *in vivo* mapping of heavy and light transcripts. *Curr. Genet.* **17**, 247-253.
- Scarpulla, R. C. (2006). Nuclear control of respiratory gene expression in mammalian cells. *J. Cell. Biochem.* **97**, 673-683.
- Schroder, K., Hertzog, P. J., Ravasi, T. and Hume, D. A. (2004). Interferon- $\gamma$ : an overview of signals, mechanisms and functions. *J. Leukocyte Biol.* **75**, 163-189.
- Scott, G. R., Rogers, J. T., Richards, J. G., Wood, C. A. and Schulte, P. M. (2004). Intraspecific divergence of ionoregulatory physiology in the euryhaline teleost *Fundulus heteroclitus*: possible mechanisms of freshwater adaptation. *J. Exp. Biol.* **207**, 3399-3410.
- Scott, G. R., Keir, K. R. and Schulte, P. M. (2005). Effects of spironolactone and RU486 on gene expression and cell proliferation after freshwater transfer in the euryhaline killifish. *J. Comp. Physiol. B* **175**, 499-510.
- Shaw, J. R., Gabor, K., Hand, E., Lankowski, A., Durant, L., Thibodeau, R., Stanton, C. R., Barnaby, R., Coutermarsh, B., Karlson, K. H. et al. (2007). Role of glucocorticoid receptor in acclimation of killifish (*Fundulus heteroclitus*) to seawater and effects of arsenic. *Am. J. Physiol. Regul. Integr. Comp. Physiol.* **292**, R1052-R1060.
- Singer, T. D., Tucker, S. J., Marshall, W. S. and Higgins, C. F. (1998). A divergent CFTR homologue: highly regulated salt transport in the euryhaline teleost *F. heteroclitus*. *Am. J. Physiol. Cell Physiol.* **43**, C715-C723.
- Siu, M. K. Y., Lee, W. M. and Cheng, C. Y. (2003). The interplay of collagen IV, tumor necrosis factor- $\alpha$ , gelatinase B (matrix metalloproteinase-9), and tissue inhibitor of metalloproteinases-1 in the basal lamina regulates sertoli cell-tight junction dynamics in the rat testis. *Endocrinology* **144**, 371-387.
- Smith, M. W., Chapman, R. W. and Powers, D. A. (1998). Mitochondrial DNA analysis of Atlantic Coast, Chesapeake Bay, and Delaware Bay populations of the teleost *Fundulus heteroclitus* indicates temporally unstable distributions over geologic time. *Mol. Mar. Biol. Biotech.* **7**, 79-87.
- Storey, J. D. and Tibshirani, R. (2003). Statistical significance for genomewide studies. *Proc. Natl. Acad. Sci. USA* **100**, 9440-9445.
- Strasser, A., O'Connor, L. and Dixit, V. M. (2000). Apoptosis signaling. *Annu. Rev. Biochem.* **69**, 217-245.
- Sweeney, J., Deegan, L. and Garritt, R. (1998). Population size and site fidelity of *Fundulus heteroclitus* in a macrotidal saltmarsh creek. *Biol. Bull.* **195**, 238-239.
- Van Itallie, C. M. and Anderson, J. M. (2006). Claudins and epithelial paracellular transport. *Annu. Rev. Physiol.* **68**, 403-429.
- Vicari, L., Eramo, A., Manzella, L., Malaguarnera, L., Iannolo, G., Gulisano, M., De Maria, R., Messina, A. and Vigneri, P. (2006). The PU.1 transcription factor induces cyclin D2 expression in U937 cells. *Leukemia* **20**, 2208-2210.
- Vijayasathya, C., Zheng, Y. M., Mullick, J., Basu, A. and Avadhani, N. G. (1995). Identification of a stable RNA encoded by the H-strand of the mouse mitochondrial D-loop region and a conserved sequence motif immediately upstream of its polyadenylation site. *Gene Expression* **4**, 125-141.
- Wachtel, M., Bolliger, M. F., Ishihara, H., Frei, K., Bluethmann, H. and Gloor, S. M. (2001). Down-regulation of occludin expression in astrocytes by tumour necrosis factor (TNF) is mediated via TNF type-1 receptor and nuclear factor- $\kappa$ B activation. *J. Neurochem.* **78**, 155-162.
- Watanabe, S., Kaneko, T. and Aida, K. (2005). Aquaporin-3 expressed in the basolateral membrane of gill chloride cells in Mozambique tilapia *Oreochromis mossambicus* adapted to freshwater and seawater. *J. Exp. Biol.* **208**, 2673-2682.
- Watanabe, S., Hirano, T., Grau, E. G. and Kaneko, T. (2009). Osmosensitivity of prolactin cells is enhanced by the water channel aquaporin-3 in a euryhaline Mozambique tilapia (*Oreochromis mossambicus*). *Am. J. Physiol. Regul. Integr. Comp. Physiol.* **296**, R446-R453.
- Whitehead, A. (2009). Comparative mitochondrial genomics within and among species of killifish. *BMC Evol. Biol.* **9**, 11.
- Whitehead, A. (2010). The evolutionary radiation of diverse osmotolerant physiologies in killifish (*Fundulus* sp.). *Evolution* **64**, 2070-2085.
- Whitehead, A. and Crawford, D. L. (2006a). Neutral and adaptive variation in gene expression. *Proc. Natl. Acad. Sci. USA* **103**, 5425-5430.
- Whitehead, A. and Crawford, D. L. (2006b). Variation within and among species in gene expression: raw material for evolution. *Mol. Ecol.* **15**, 1197-1211.
- Whitehead, A., Roach, J. L., Zhang, S. and Galvez, F. (2011a). Genomic mechanisms of evolved physiological plasticity in killifish distributed along an environmental salinity gradient. *Proc. Natl. Acad. Sci. USA* **108**, 6193-6198.
- Whitehead, A., Galvez, F., Zhang, S. J., Williams, L. M. and Oleksiak, M. F. (2011b). Functional genomics of physiological plasticity and local adaptation in killifish. *J. Hered.* **102**, 499-511.
- Wood, C. M. and Grosell, M. (2008). A critical analysis of transepithelial potential in intact killifish (*Fundulus heteroclitus*) subjected to acute and chronic changes in salinity. *J. Comp. Physiol. B* **178**, 713-727.
- Wood, C. M. and Grosell, M. (2009). TEP on the tide in killifish (*Fundulus heteroclitus*): effects of progressively changing salinity and prior acclimation to intermediate or cycling salinity. *J. Comp. Physiol. B* **179**, 459-467.
- Yamada, T. and Bork, P. (2009). Evolution of biomolecular networks – lessons from metabolic and protein interactions. *Nat. Rev. Mol. Cell Biol.* **10**, 791-803.
- Yozzo, D. and Smith, D. (1997). Composition and abundance of resident marsh-surface nekton: comparison between tidal freshwater and salt marshes in Virginia, USA. *Hydrobiologia* **362**, 9-19.
- Zall, D. M., Fisher, D. and Garner, M. Q. (1956). Photometric determination of chlorides in water. *Anal. Chem.* **28**, 1665-1668.
- Zheng, D., Kille, P., Feeney, G. P., Cunningham, P., Handy, R. D. and Hogstrand, C. (2010). Dynamic transcriptomic profiles of zebrafish gills in response to zinc depletion. *BMC Genomics* **11**, 548.
